# A Longitudinal Model for Functional Connectivity Using Resting-State fMRI

Brian Hart<sup>1</sup>, Ivor Cribben<sup>2</sup>, Mark Fiecas<sup>1</sup>, and for the Alzheimer’s Disease Neuroimaging Initiative <sup>\*1</sup>

<sup>1</sup>University of Minnesota

<sup>2</sup>University of Alberta

## Abstract

Many neuroimaging studies collect functional magnetic resonance imaging (fMRI) data in a longitudinal manner. The current fMRI modeling literature lacks a generally applicable model appropriate for longitudinal designs. In this work, we build a novel longitudinal functional connectivity (FC) model using a variance components approach. First, for all subjects’ visits, we account for the autocorrelation inherent in the fMRI time series data using a non-parametric technique. Second, we use a generalized least squares approach to estimate 1) the within-subject variance component shared across the population, 2) the FC network, and 3) the FC network’s longitudinal trend. Our novel method seeks to account for the within-subject dependence across multiple visits, the variability due to the subjects being sampled from a population, and the autocorrelation present in fMRI data, while restricting the number of parameters in order to make the method computationally feasible and stable. We develop a permutation testing procedure to draw valid inference on group differences in baseline FC and change in FC over time between a set of patients and a comparable set of controls. To examine performance, we run a series of simulations and apply the model to longitudinal fMRI data collected from the Alzheimer’s Disease Neuroimaging Initiative database.

## 1 Introduction

Resting-state functional magnetic resonance imaging (fMRI) captures a series of images of the brain in subjects who are not given a particular task to perform while in the scanner. The scanner repeatedly captures blood oxygenation level dependent (BOLD) signals at hundreds of thousands of locations within the brain, creating a time series of images of the brain in a resting state. By capturing the BOLD signal of the resting brain, this imaging modality provides an opportunity for researchers to examine the intrinsic brain network of people from a certain population. The primary tool for doing so is the analysis of functional connectivity (FC) networks. We define FC as the temporal dependence, measured through cross-correlations, in the blood oxygenation level dependent (BOLD) signals between brain regions [Friston et al., 1993].

The Alzheimer’s Disease Neuroimaging Initiative (ADNI) collected resting-state fMRI images from patients with Alzheimer’s disease (AD) and a comparable cognitively normal (CN) control group over the course of their follow-up. The resulting data is collected from multiple subjects in 1-6 sessions over many years. We motivate the challenges of a longitudinal FC analysis with the following preliminary analysis. Figure 1 shows spaghetti plots of the FC between the time series obtained from two region-of-interest (ROI) pairs for the AD and CN groups. The clustering of points within each line shows the within-subject dependence. In addition, there is considerable within-subject and within-group noise present in the estimates of FC. Finally, what is not evident from the figure is that the time series from which these correlations were obtained exhibit autocorrelation that contributes to the overall variability in FC. To add another level of complication, the figure depicts the marginal relationship between two ROIs, but to properly model the entire network we need a joint model that considers the network of all possible pairwise groupings of the chosen ROIs.

---

\*Data used in preparation of this article were obtained from the Alzheimers Disease Neuroimaging Initiative (ADNI) database ([adni.loni.usc.edu](http://adni.loni.usc.edu)). As such, the investigators within the ADNI contributed to the design and implementation of ADNI and/or provided data but did not participate in analysis or writing of this report. A complete listing of ADNI investigators can be found at: [http://adni.loni.usc.edu/wp-content/uploads/how\\_to\\_apply/ADNI\\_Acknowledgement\\_List.pdf](http://adni.loni.usc.edu/wp-content/uploads/how_to_apply/ADNI_Acknowledgement_List.pdf)

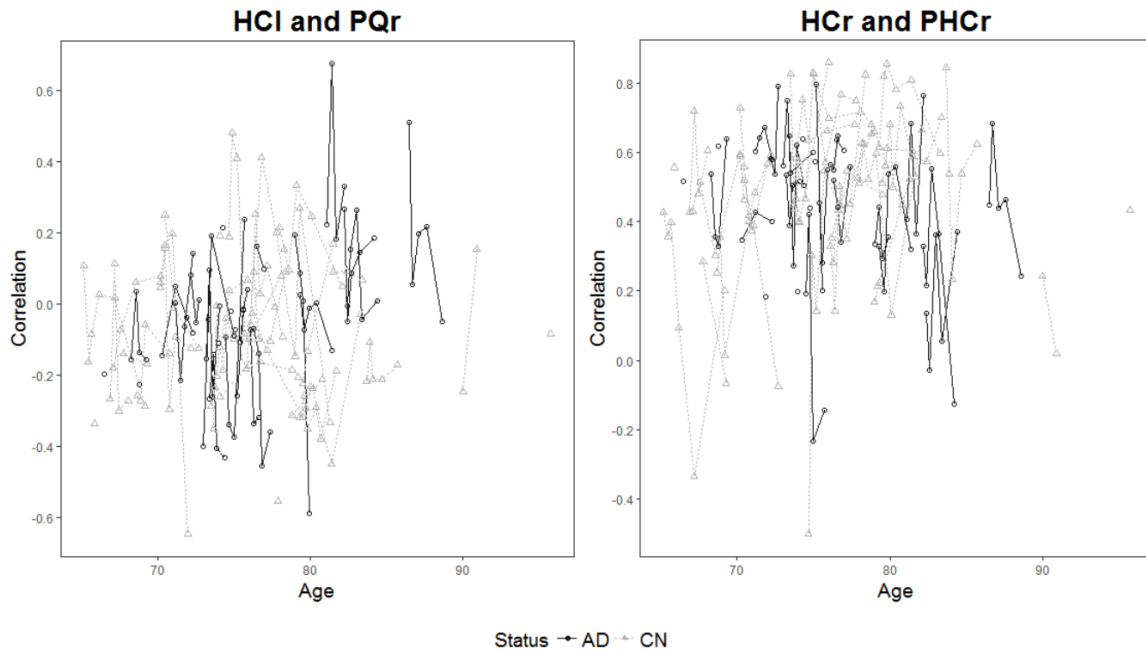

Figure 1: Spaghetti plots of the correlation between two regions of interest (ROI) against age. Each point represents a visit, and each line represents a subject. The ROIs represented in these plots are the left and right hippocampus (HCl and HCr), right precuneus (PQR), and right parahippocampus (PHCr).

Previous works have demonstrated the utility of FC analysis as a way to better understand the underlying neurological process of a certain disease and its progression. For example, past research has identified altered FC between healthy aging patients and those that suffer from AD. Even among CN individuals, FC demonstrates aging effects that are heterogeneous between different brain regions [Chen et al., 2016]. Chase [2014] and Hafkemeijer et al. [2012] showed altered FC patterns beyond healthy aging in patients with dementia and AD. Many other works, including Ren et al. [2016] and Wang et al. [2007] have noted abnormal FC in various stages of AD. Wang et al. [2012] even demonstrated the impact of family history of AD on FC. In addition, Xiang et al. [2013] and Li et al. [2015] showed the link between decreased network FC and progression from a CN state, to mild cognitive impairment (MCI), and finally, to AD. These previous works, however, used cross-sectional models. Our work will build off of these prior results on the clinical utility of FC as a potential biomarker for AD.

Of the previously mentioned studies, only Ren et al. [2016] utilized truly longitudinal data. Aging effects are often measured by comparing a young group with an elderly group rather than following the same group of subjects over time. A comprehensive longitudinal model that tests for differences in baseline and trend is needed to verify and expand on previous results using a single modeling framework. Finn and Constable [2016] demonstrated that CN patients have distinct brain signatures in fMRI images, implying that separate scans from a single individual exhibit some level of dependence. This finding backs up the within-subject dependence visible in Figure 1 and can be leveraged in a longitudinal framework which accounts for this dependence to better model aging effects.

In this work, we fill a gap in the literature by proposing a novel longitudinal model and inference procedure that considers the network of all possible pairwise groupings of the chosen ROIs in resting-state fMRI data. Our longitudinal variance components FC model accounts for the within-subject dependence across multiple visits, the variability due to the subjects being sampled from a population, and any autocorrelation present in fMRI time series. We also propose an efficient permutation based inference procedure that allows for valid hypothesis testing of group differences in baseline FC networks and FC network aging effects.

The remainder of the paper is laid out as follows. In Section 2 we formally introduce the model, including the estimation and inference procedures. We also explain the design of the simulation study and more fully introduce the ADNI data. Section 3 contains the results of the simulation study and the analysis of the ADNI data. We discuss these results and future work in greater detail in Section 4 and close with a conclusion in Section 5. The R code for implementing the methods proposed in this paper may be found at <https://github.com/mfiecas/longitudinalFC>.

## 2 Materials and Methods

### 2.1 Model Specification

Suppose we have a cohort of  $N$  individuals and let  $P$  denote the number of ROIs selected for a FC network analysis. Then we collect a  $P$ -variate, detrended fMRI time series of length  $T$  from the preprocessed fMRI images of each of the  $N$  subjects at each visit. To keep the dimensionality of the data reasonable in a whole network analysis, we condense the data to the ROI level with a time series for each ROI at each visit. We define the ROI level time series as the average of the time series from each voxel within a region of the brain. Let the subscripts  $i$  and  $j$  denote subject and visit, respectively. A particular subject returns for  $J_i$  total visits, and the cohort has a total of  $J = \sum_{i=1}^N J_i$  visits. Let  $Y_i$  represent the vector of sample correlation coefficients of length  $QJ_i$ , where  $Q = P(P-1)/2$  is the number of ROI pairs. Within  $Y_i$ , the  $Q$  correlations from the first visit,  $Y_{i1}$ , are followed by the  $Q$  correlations from the second visit,  $Y_{i2}$ , and so on until the  $J_i$ -th visit. The full response vector  $Y$  is formed by stacking the  $N$  different  $Y_i$  vectors. Our longitudinal model for the FC network will be a linear model with baseline effect  $\beta_0$  and longitudinal trend  $\beta_1$ , where each of these model parameters are vectors of length  $Q$ . We denote the time at visit  $j$  for subject  $i$  as  $v_{ij}$ . The vector  $v_i$  is formed by stacking the  $J_i$  distinct  $v_{ij} \otimes \mathbb{1}_Q$  vectors for subject  $i$ , where  $\mathbb{1}_Q$  is a vector of ones of length  $Q$ . Likewise  $v$  is formed by stacking the  $N$  distinct  $v_i$  vectors. Depending on the nature of the data and the research questions at hand,  $v_{ij}$  can be set to the visit number, the time since baseline, or the patient's age. Then, denoting element-wise multiplication with  $*$ , our model has the following linear form:

$$Y = \mathbb{1}_J \otimes \beta_0 + v * (\mathbb{1}_J \otimes \beta_1) + \varepsilon, \text{ where } \text{Var}(\varepsilon) = \Sigma + \Psi. \quad (1)$$

The key element in our longitudinal linear model is the variance structure of the error term. We separate the error variance into two components,  $\Sigma$  and  $\Psi$ . Here  $\Sigma$  is block diagonal where each  $Q \times Q$  block,  $\Sigma_{ij}$ , accounts for the within visit variance present in visit  $j$  for subject  $i$ . The second variance component,  $\Psi$ , is also block diagonal with a  $QJ_i \times QJ_i$  block for participant  $i$ . These diagonal blocks only vary from subject to subject in their dimension due to potentially differing visit numbers for each participant. Let  $\Psi_{diag}$  be an arbitrary diagonal block of  $\Psi$ . We then further break  $\Psi_{diag}$  into two components  $\Psi_0$  and  $\Psi_1$ .  $\Psi_0$  is a  $Q \times Q$  block that is repeated along the diagonal of each  $\Psi_{diag}$ . This term models the within-visit covariability not captured by  $\Sigma$ .  $\Psi_1$  is a  $Q \times Q$  block which populates the remaining off diagonal blocks of  $\Psi_{diag}$ , modeling the within-subject, across visit covariability. This term captures the dependence between multiple visits from the same subject.

We write Equation 1 in the form of a linear model with a vector response, which allows us to use existing methods for estimating the vector parameters and for statistical inference. To this end, our model can also be written in the standard linear model form with a design matrix  $X$ . Let  $X_{ij} = [1 \ v_{ij}] \otimes I_Q$ , where  $I_Q$  is the  $Q \times Q$  identity matrix. To form  $X_i$ , the portion of the design matrix specific to subject  $i$ , we stack the  $J_i$  individual  $X_{ij}$  matrices. Likewise, to form  $X$  we stack the  $N$  individual  $X_i$  matrices. If we define  $\beta$  as a vector of length  $2Q$  where the first  $Q$  elements are  $\beta_0$  and the last  $Q$  elements are  $\beta_1$ , then Equation 1 can be written as  $Y = X\beta + \varepsilon$ .

Figure 2 shows a workflow chart of the procedure used to estimate the model parameters and test hypotheses which are subsequently described in more detail.

The model proposed here shares a basic structure with the model of Fiecas et al. [2017], but we make notable advances allowing for much broader applicability and utility. Fiecas et al. [2017] was developed as a cross-sectional model and thus is not suitable for the growing amount of longitudinal fMRI data available to the neuroimaging community. The new method allows for a more complete variance structure that captures dependence present in multiple visits from the same subject. At the same time, we increase the parameter space of the model by adding slopes to measure change in FC over time. Adding a more complex variance structure and slope term also necessitates a new inference procedure, since a simple permutation of group assignment will no longer be sufficient. To keep the permutation test computationally feasible, we have designed our procedure to fit the increased number of relevant hypotheses into one efficient permutation schedule. These crucial technical advances open the door to many new scientific applications. The addition of a slope term is crucial to using fMRI as a method to detect differential aging effects in two populations. We capture in more detail the complexity of the data by modeling it through time instead of collapsing everything into a single time point.

### 2.2 Estimating Within Visit Covariance

We start by estimating the sample correlation coefficient between all ROI pairs for all visits and their corresponding variances and covariances. Let  $(w_{1t}, \dots, w_{Pt})'$  for  $t \in \{1, 2, \dots, T\}$  be the time series from a single visit. Then for the  $p$ -th and  $q$ -th ROIs, where  $p, q \in \{1, 2, \dots, P\}$ , we have

$$r_{pq} = \frac{\sum_{t=1}^T (w_{pt} - \bar{w}_p)(w_{qt} - \bar{w}_q)}{\sqrt{\sum_{t=1}^T (w_{pt} - \bar{w}_p)^2 \sum_{t=1}^T (w_{qt} - \bar{w}_q)^2}}. \quad (2)$$

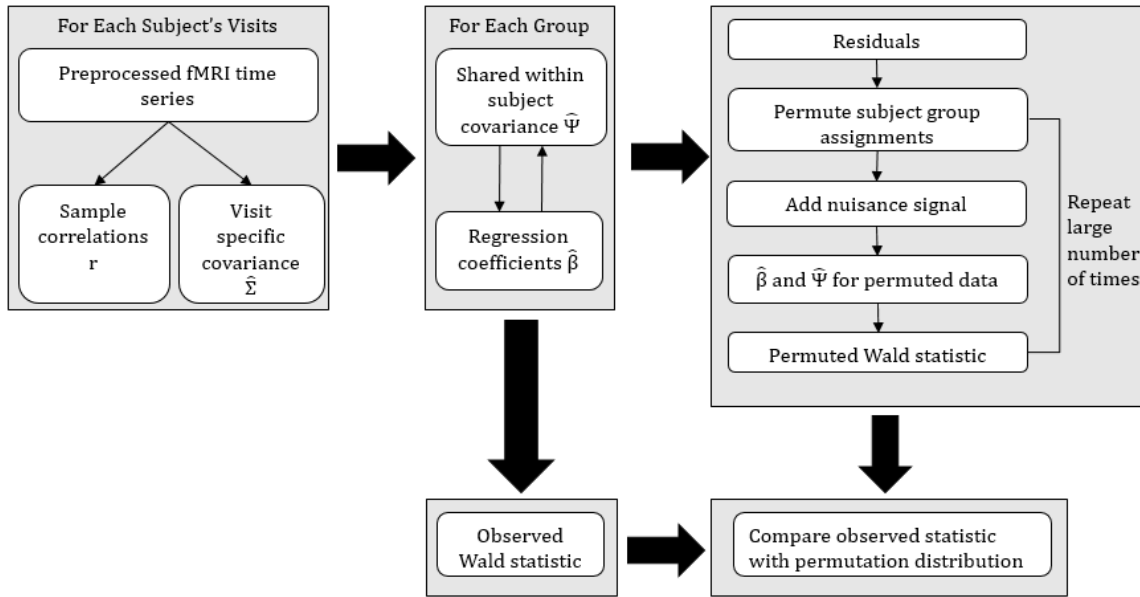

Figure 2: A workflow chart of the estimation and inferential procedure of our variance components model.

Frequently, a Fisher transform,  $g(x) = \tanh^{-1}(x) = 0.5 \log[(1+x)/(1-x)]$ , is applied to the resulting correlations as a variance stabilizing transformation. Unfortunately, this approach assumes the observations from the time series are independent and therefore leads to invalid inference due to the inherent autocorrelation in fMRI time series data. To resolve this issue, we use the large-sample variance estimation derived in Roy [1989] for any two autocorrelated time series. To obtain a consistent estimator of this large-sample variance we use the method of Melard et al. [1991]. We then populate the within-visit covariance matrix  $\Sigma_{ij}$  for each observed visit using these results, which gives us the estimate  $\hat{\Sigma}$ .

### 2.3 Estimating Between Subject Covariance, $\Psi$ , and $\beta$

Utilizing a generalized least squares (GLS) approach, we now proceed with the estimation of the between subject covariance  $\Psi$  and the regression coefficients  $\beta$ , conditional on the previously estimated within-visit covariances,  $\hat{\Sigma}_{ij}$ .

Although the framework allows for many different structures for  $\Psi$ , we assume a block compound symmetry structure so that all diagonal blocks,  $\Psi_0$ , are equal and all off diagonal blocks,  $\Psi_1$ , are equal. The block compound symmetry assumption keeps the parameter space to a reasonable size. To initiate the estimation process we use the ordinary least squares estimator  $\hat{\beta} = (X'X)^{-1}X'Y$  to provide a good starting estimate of  $\beta$ . We then update the two components of  $\Psi$  using the following formulas:

$$\hat{\Psi}_0 = \frac{1}{\sum_{i=1}^N J_i} \sum_{i=1}^N \sum_{j=1}^{J_i} (Y_{ij} - X_{ij}\hat{\beta})'(Y_{ij} - X_{ij}\hat{\beta}) - \hat{\Sigma}_{ij}, \quad \text{and} \quad (3)$$

$$\hat{\Psi}_1 = \frac{1}{\sum_{i=1}^N \frac{J_i(J_i-1)}{2}} \sum_{i=1}^N \sum_{j \neq k} (Y_{ij} - X_{ij}\hat{\beta})'(Y_{ik} - X_{ik}\hat{\beta}). \quad (4)$$

These estimators bear a resemblance to the mean squared error. For  $\hat{\Psi}_0$ , the sum of the squared residuals for all visits are summed. Then to obtain the final estimate, we subtract the previously estimated variance component  $\hat{\Sigma}$  and divide the covariance matrix by the total number of visits. We estimate  $\Psi_1$  in a similar fashion. In this case, we calculate and average the cross products of the residuals from all pairs of visits for each subject. We do not subtract the  $\hat{\Sigma}$  term here because  $\hat{\Sigma}$  has been set to 0 for the off diagonal blocks occupied by  $\Psi_1$ . These simple estimators, obtained through matching moments, provide a significant reduction in computation in comparison to a maximum likelihood approach.

With an estimate of  $\Psi$ , we can now use the standard GLS formula to update the regression coefficients as follows:  $\hat{\beta} = (X'(\hat{\Sigma} + \hat{\Psi})^{-1}X)^{-1}X'(\hat{\Sigma} + \hat{\Psi})^{-1}Y$ . At this point we have two choices: to iteratively update  $\hat{\Psi}$  and  $\hat{\beta}$  until convergence (full convergence), or accept the estimates (one-step) and proceed with the inferential procedure.

The one-step estimator provides a significant advantage in computing time as  $\hat{\Psi}$  and  $\hat{\beta}$  must be estimated for each permutation of the inference procedure [Ganjgahi et al., 2015]. Additionally, Amemiya [1977] proved that the one-step GLS estimator maintains consistency.

We estimate  $\hat{\beta}$ ,  $\hat{\Psi}$ , and  $\hat{\Sigma}$  for each group separately using this estimation procedure. Superscripts on the parameter estimates denote the group (e.g.  $\hat{\beta}^{G_1}$ ,  $\hat{\Psi}^{G_1}$ , and  $\hat{\Sigma}^{G_1}$  are the estimates for group 1).

## 2.4 Inference

Two general hypothesis tests are of interest in a longitudinal FC model: the group difference between the baseline FC, and the group difference in the rate of change in FC. For each hypothesis, we would like to test for the significance of the group differences in both the global FC networks and the local ROI pair FC. We refer to the vector wide tests of differences in the parameters  $\beta_0$  and  $\beta_1$  as global tests and refer to tests of group differences in single elements of  $\beta_0$  or  $\beta_1$  as local tests. To accomplish our hypothesis testing objectives, we use the Wald statistic,  $(C(\hat{\beta}^{G_1} - \hat{\beta}^{G_2}))'(C(\widehat{\text{Var}}(\hat{\beta}^{G_1}) + \widehat{\text{Var}}(\hat{\beta}^{G_2}))C')^{-1}C(\hat{\beta}^{G_1} - \hat{\beta}^{G_2})$ , and adjust the contrast matrix,  $C$ , depending on the hypothesis of interest.

We estimate the variance of each group's regression coefficients using  $\widehat{\text{Var}}(\hat{\beta}) = (X'(\hat{\Sigma} + \hat{\Psi})^{-1}X)^{-1}$ . While the Wald statistic is asymptotically  $\chi^2$  with degrees of freedom equal to the rank of  $C$ , the asymptotic distribution poorly approximates the finite sample distribution with a moderate number of ROIs. Instead of relying on asymptotics, we propose a permutation procedure for all inference. Chung and Romano [2013] showed that using a studentized test statistic, such as the proposed Wald statistic, allows for valid inference in many permutation test settings.

We use a permutation strategy suggested by Ganjgahi et al. [2015] and originally proposed by Ter Braak [1992]. A recent comparison of the performance of many different permutation strategies by Winkler et al. [2014] showed that the Ter Braak permutation testing procedure maintains nominal Type I error and is fairly robust. This method offers the additional advantage that the data only needs to be permuted once and the model only fit twice at each iteration of the permutation test in order to test all local and global hypotheses. Testing all hypotheses under a single permutation schedule greatly reduces the computational burden of the testing procedure.

The permutation testing procedure is performed as follows:

1. Calculate residuals from the fitted model for each subject:  $e_i = Y_i - X_i\hat{\beta}^G$  with subject  $i$  in group  $G$ .
2. Permute group assignments of  $e_i$ .
3. Add the nuisance signal back to  $e_i$  based on new permuted group assignments  $G^*$ . For the main effect (intercept) tests we add in the longitudinal trends by setting  $e_{ij}^* = e_{ij} + v_{ij}\hat{\beta}_1^{G^*}$ . Likewise, for the interaction (slope) tests we set  $e_{ij}^* = e_{ij} + \hat{\beta}_0^{G^*}$ .
4. Refit the model on  $e^*$ , the permuted, adjusted, and stacked residuals from step 3.
5. Calculate a new Wald statistic for the fitted values of  $\hat{\beta}^{G^*}$  and  $\hat{\Psi}^{G^*}$ .

We repeat this process a large number of times to create a permutation distribution to be used as a reference distribution of the originally calculated test statistic. Because the obtained  $p$ -values are estimated, we additionally use the permutation  $p$ -value correction procedure of Phipson et al. [2010]. To account for the fact that  $2Q$  local hypotheses are tested simultaneously, we then apply the false discovery rate (FDR) controlling procedure of Benjamini and Hochberg [1995] to the corrected  $p$ -values from the local tests. The Phipson correction helps avoid unadjusted  $p$ -values with value 0 which may improperly maintain significance after a multiple comparisons correction.

## 2.5 Simulated Data

A series of simulations were designed with different data generating mechanisms to assess model performance. In all scenarios each time series contained 120 time points and had an autocorrelation structure that followed a first-order autoregressive process with an AR parameter of 0.3. A multivariate time series was simulated for each subject at three visits. For each visit, the  $Q$  correlations were simulated from a multivariate normal distribution where the mean and variance varied by group based on the simulation setting. For group 1, the mean vector was always assumed to be 0 and the covariance matrix was the same across all simulation settings. The simulations used either 3, 5, or 10 as the dimension of the multivariate normal distribution. For the 3 and 5 dimension settings only the first element of the group 2 mean vector was allowed to vary by simulation setting, while the other elements were set to match group 1. For the 10 dimension settings the first 5 elements of the group 2 mean vector varied by simulation setting. 1,000 Monte Carlo simulations were run for all simulation settings with 3 and 5 dimensions, and 500 simulations were run for the 10 dimensional simulation settings. Group sizes of 15 and 30 were considered. The true variance of the correlations was either equal for the two groups or the group 2 variance was double the group 1 variance. 500 permutations were used for the permutation test for all settings.



To increase model parsimony, different structures can be considered for  $\Sigma_{ij}$ ,  $\Psi_0$ , and  $\Psi_1$ . In the simulation study, we used scaled identity or compound symmetry structures for the two  $\Psi$  components. We estimated these components by setting all diagonal elements of each matrix to the average of the diagonal elements and likewise for the off diagonal elements [Laird, 2004]. For  $\Sigma_{ij}$  we considered unstructured and diagonal options.

Three models were fit to each simulated dataset. The first was a full convergence model which iterated between  $\hat{\Psi}$  and  $\hat{\beta}$  until convergence. It assumed an unstructured  $\Sigma_{ij}$  and compound symmetry for  $\Psi_0$  and  $\Psi_1$ . This model is referred to as the full convergence full variance model. The second was a one-step model which stops after one iteration of solving for  $\hat{\Psi}$  and  $\hat{\beta}$ . It also assumed an unstructured  $\Sigma_{ij}$  and compound symmetry for  $\Psi_0$  and  $\Psi_1$ , and it is referred to as the one-step convergence full variance model. The final model was a one-step model which assumed a diagonal structure for  $\Sigma_{ij}$  and scaled identity structures for  $\Psi_0$  and  $\Psi_1$ . The last model is referred to as the one-step convergence reduced variance model.

## 2.6 ADNI Data

Data used in the preparation of this article were obtained from the ADNI database (<http://adni.loni.usc.edu>). The ADNI was launched in 2003 as a public-private partnership, led by Principal Investigator Michael W. Weiner, MD. The primary goal of ADNI has been to test whether serial magnetic resonance imaging (MRI), positron emission tomography (PET), other biological markers, and clinical and neuropsychological assessment can be combined to measure the progression of MCI and early AD. For up-to-date information, see [www.adni-info.org](http://www.adni-info.org).

A subset of the ADNI data was used to demonstrate a practical application of the model. The data consists of longitudinal resting-state fMRI images collected at baseline, 3 months from baseline, 6 months from baseline, 12 months from baseline, and annually thereafter. There are two groups of interest, the CN group and the AD group. We focused our attention on late-onset AD and included only patients that were 65 years of age or older at baseline [van der Flier et al., 2011, Holland et al., 2012]. To better separate the AD and CN groups, only patients that remained in one group for the entirety of the follow-up were considered in our analysis. The remaining CN group consists of 111 visits from 30 patients (17 females and 13 males) with each patient having between 1 and 6 visits. The AD group consists of 79 visits from 26 patients (11 females and 15 males) with each patient having between 1 and 5 visits. The average age was 75.9 for the CN group with a range of 65.2 to 95.7. The AD group average age was 76.7 with a range of 66.5 to 88.6.

### 2.6.1 Preprocessing

We preprocessed the data using both FSL (version 5.0.9, <https://fsl.fmrib.ox.ac.uk/>) and AFNI (version AFNI17.0.15, <https://afni.nimh.nih.gov/>). The preprocessing steps were as follows. We 1) applied motion correction to the images using FSL's mcfirt (rigid body transform; cost function normalized correlation; reference volume the middle volume) and then 2) normalized the images into the Montreal Neurological Institute space using FSL's flirt (affine transform; cost function correlation ratio). We used FSL's fast to 3) obtain a probabilistic segmentation of the brain to obtain white matter and cerebrospinal fluid (CSF) probabilistic maps, thresholded at 0.75. Using FSL's fslmaths, we 4) spatially smoothed the volumes using a Gaussian kernel with FWHM=5 mm. We used AFNI's 3dDetrend to 5) remove nuisance signals, namely the six motion parameters, white matter and CSF signals, and the global signal. Finally, 6) the linear trend was removed from each time series using linear regression and a 4th order Butterworth low-pass filter with a 0.1 Hertz cutoff was applied to each fMRI time series.

### 2.6.2 Analysis

$P = 10$  ROIs from the ADNI dataset were selected for analysis: left and right hippocampus (HC), parahippocampus (PHC), posterior cingulate (PCC), precuneus (PQ), and prefrontal cortex (PFC). In all results that follow an l suffix for an ROI denotes the left side of the brain and an r suffix denotes the right side. We selected these ROIs because they make up the hippocampi and the default mode network (DMN) in which FC has been shown to differ between CN and AD groups [Supekar et al., 2008, Greicius et al., 2004, Sorg et al., 2007].

Four versions of the model were fit to the ADNI data with differing assumptions. The first (Model 1) is a one-step estimation model which assumes a compound symmetry structure for  $\Psi_0$  and  $\Psi_1$  and unstructured diagonal blocks for  $\Sigma$ . The next (Model 2), makes the same assumptions for  $\Psi_0$ ,  $\Psi_1$ , and  $\Sigma$  but uses the full convergence estimator. Model 3 is a one-step estimation model assuming scaled identity structures for  $\Psi_0$  and  $\Psi_1$  and a diagonal structure for  $\Sigma$ . The final model (Model 4) is a one-step estimation model which assumes a diagonal structure for  $\Psi_0$ , sets all elements of  $\Psi_1$  to 0, and assumes a diagonal structure for  $\Sigma$ . This final model is equivalent to a massive univariate approach which ignores the within-subject dependence. 5,000 permutations were run for the permutation test for all models. The intercept of each model represents the FC network of each group at age 65.

### 3 Results

Table 1: Type I error rates for simulation study for all globally null simulation settings. Type I errors for the main effect (group difference in intercepts) and interaction effect (group difference in slopes) are reported both globally and locally. The global Type I errors are averaged across all models. The local Type I errors reported are unadjusted and averaged across all simulations and all null ROI pairs.

|                                  |               | Convergence Type:<br>Variance Structure: |           |           | Full<br>Full |           | One-Step<br>Full |           |            | One-Step<br>Reduced |           |
|----------------------------------|---------------|------------------------------------------|-----------|-----------|--------------|-----------|------------------|-----------|------------|---------------------|-----------|
|                                  | Group<br>Size | Variance                                 | $\beta_0$ | $\beta_1$ | 3<br>ROIs    | 5<br>ROIs | 3<br>ROIs        | 5<br>ROIs | 10<br>ROIs | 3<br>ROIs           | 5<br>ROIs |
| Main<br>Effect<br>Global<br>Test | 15            | Equal                                    | 0         | 0         | 0.061        | 0.052     | 0.057            | 0.055     | 0.066      | 0.056               | 0.054     |
|                                  |               | Group 2                                  | 0         | 0.1       | 0.065        | 0.065     | 0.067            | 0.071     | 0.064      | 0.067               | 0.063     |
|                                  |               | Double                                   | 0         | 0         | 0.058        | 0.049     | 0.055            | 0.053     | 0.054      | 0.056               | 0.048     |
|                                  | 30            | Equal                                    | 0         | 0         | 0.045        | 0.049     | 0.046            | 0.050     | 0.066      | 0.043               | 0.047     |
|                                  |               | Group 2                                  | 0         | 0.1       | 0.046        | 0.050     | 0.054            | 0.047     | 0.066      | 0.048               | 0.049     |
|                                  |               | Double                                   | 0         | 0         | 0.057        | 0.054     | 0.058            | 0.053     | 0.062      | 0.058               | 0.060     |
| Main<br>Effect<br>Local<br>Test  | 15            | Equal                                    | 0         | 0         | 0.071        | 0.061     | 0.073            | 0.061     | 0.066      | 0.066               | 0.062     |
|                                  |               | Group 2                                  | 0         | 0.1       | 0.064        | 0.067     | 0.067            | 0.069     | 0.069      | 0.064               | 0.067     |
|                                  |               | Double                                   | 0         | 0         | 0.064        | 0.063     | 0.061            | 0.062     | 0.071      | 0.064               | 0.064     |
|                                  | 30            | Equal                                    | 0         | 0         | 0.050        | 0.059     | 0.048            | 0.058     | 0.058      | 0.048               | 0.057     |
|                                  |               | Group 2                                  | 0         | 0.1       | 0.053        | 0.058     | 0.051            | 0.058     | 0.056      | 0.052               | 0.057     |
|                                  |               | Double                                   | 0         | 0         | 0.063        | 0.055     | 0.062            | 0.055     | 0.057      | 0.060               | 0.056     |
| Interaction<br>Global<br>Test    | 15            | Equal                                    | 0         | 0         | 0.062        | 0.054     | 0.052            | 0.057     | 0.072      | 0.049               | 0.052     |
|                                  |               | Group 2                                  | 0.1       | 0         | 0.046        | 0.054     | 0.044            | 0.049     | 0.076      | 0.044               | 0.049     |
|                                  |               | Double                                   | 0         | 0         | 0.057        | 0.067     | 0.050            | 0.062     | 0.070      | 0.051               | 0.069     |
|                                  | 30            | Equal                                    | 0         | 0         | 0.054        | 0.059     | 0.058            | 0.061     | 0.078      | 0.056               | 0.058     |
|                                  |               | Group 2                                  | 0.1       | 0         | 0.052        | 0.067     | 0.049            | 0.063     | 0.070      | 0.051               | 0.051     |
|                                  |               | Double                                   | 0         | 0         | 0.068        | 0.065     | 0.071            | 0.061     | 0.072      | 0.075               | 0.057     |
| Interaction<br>Local<br>Test     | 15            | Equal                                    | 0         | 0         | 0.059        | 0.062     | 0.058            | 0.062     | 0.067      | 0.059               | 0.064     |
|                                  |               | Group 2                                  | 0.1       | 0         | 0.055        | 0.060     | 0.054            | 0.057     | 0.071      | 0.057               | 0.060     |
|                                  |               | Double                                   | 0         | 0         | 0.063        | 0.065     | 0.065            | 0.061     | 0.072      | 0.064               | 0.063     |
|                                  | 30            | Equal                                    | 0         | 0         | 0.074        | 0.067     | 0.071            | 0.061     | 0.067      | 0.074               | 0.064     |
|                                  |               | Group 2                                  | 0         | 0         | 0.050        | 0.055     | 0.049            | 0.054     | 0.059      | 0.049               | 0.055     |
|                                  |               | Double                                   | 0.1       | 0         | 0.054        | 0.059     | 0.053            | 0.058     | 0.056      | 0.058               | 0.059     |
| 30                               | Group 2       | 0                                        | 0         | 0.061     | 0.059        | 0.062     | 0.057            | 0.060     | 0.063      | 0.060               |           |
|                                  | Double        | 0.1                                      | 0         | 0.057     | 0.055        | 0.057     | 0.055            | 0.058     | 0.058      | 0.055               |           |

#### 3.1 Simulated Data

Tables 1 and 2 show results from the simulation study. Table 1 shows the global and local Type I error for the main effect and interaction across all simulations. The reported global test results are the average global Type I errors across 500 or 1,000 Monte Carlo runs. The local test results are the average Type I errors of the unadjusted  $p$ -values for all null hypotheses across the 500 or 1,000 Monte Carlo runs. While the local  $p$ -values would be adjusted in practice, the numbers in the table provide easy reference to a nominal Type I error of 0.05. Table 2 shows the average global power and average local power using false discovery rate adjusted  $p$ -values. All  $p$ -values were corrected using the method of Phipson et al. [2010]. Additional simulation study results can be found in Table S1 in 7.

#### 3.2 ADNI Data

Table 3 shows results from the global hypothesis tests and all local hypothesis tests that were significant before  $p$ -value adjustment for Model 1. The results for the other three models can be found in Table S2 from 7. Neither the overall main effect or interaction term were found to be significantly different in the global tests for any of

Table 2: The power calculations for the simulation study. Power results for the main effect (group difference in intercepts) and interaction effect (group difference in slopes) are reported both globally and locally. The global power results are averaged across all models. The local power results reported are unadjusted and averaged across all simulations and all non-null ROI pairs.

|                         |     | Convergence Type: |           | Full Full |        | One-Step Full |        |        | One-Step Reduced |        |        |
|-------------------------|-----|-------------------|-----------|-----------|--------|---------------|--------|--------|------------------|--------|--------|
|                         |     | Variance          | $\beta_0$ | $\beta_1$ | 3 ROIs | 5 ROIs        | 3 ROIs | 5 ROIs | 10 ROIs          | 3 ROIs | 5 ROIs |
| Group Size              |     |                   |           |           |        |               |        |        |                  |        |        |
| Main Effect Global Test | 15  | Equal             | 0.1       | 0         | 0.382  | 0.223         | 0.369  | 0.229  | 0.482            | 0.372  | 0.211  |
|                         |     |                   | 0.1       | 0.1       | 0.389  | 0.214         | 0.390  | 0.203  | 0.466            | 0.391  | 0.204  |
|                         |     | Group 2 Double    | 0.1       | 0         | 0.300  | 0.196         | 0.294  | 0.185  | 0.356            | 0.303  | 0.185  |
|                         | 0.1 |                   | 0.1       | 0.328     | 0.180  | 0.321         | 0.170  | 0.386  | 0.316            | 0.177  |        |
|                         | 30  |                   | Equal     | 0.1       | 0      | 0.674         | 0.491  | 0.679  | 0.489            | 0.902  | 0.682  |
|                         |     | 0.1               |           | 0.1       | 0.684  | 0.468         | 0.686  | 0.470  | 0.884            | 0.670  | 0.456  |
| Group 2 Double          |     | 0.1               | 0         | 0.582     | 0.383  | 0.581         | 0.385  | 0.836  | 0.579            | 0.367  |        |
|                         | 0.1 | 0.1               | 0.582     | 0.383     | 0.580  | 0.380         | 0.800  | 0.572  | 0.371            |        |        |
| Main Effect Local Test  | 15  | Equal             | 0.1       | 0         | 0.412  | 0.413         | 0.413  | 0.379  | 0.270            | 0.427  | 0.458  |
|                         |     |                   | 0.1       | 0.1       | 0.424  | 0.406         | 0.417  | 0.372  | 0.233            | 0.446  | 0.410  |
|                         |     | Group 2 Double    | 0.1       | 0         | 0.294  | 0.293         | 0.296  | 0.267  | 0.206            | 0.292  | 0.307  |
|                         | 0.1 |                   | 0.1       | 0.326     | 0.304  | 0.291         | 0.253  | 0.160  | 0.330            | 0.324  |        |
|                         | 30  |                   | Equal     | 0.1       | 0      | 0.807         | 0.822  | 0.810  | 0.815            | 0.778  | 0.811  |
|                         |     | 0.1               |           | 0.1       | 0.817  | 0.800         | 0.818  | 0.790  | 0.759            | 0.816  | 0.786  |
| Group 2 Double          |     | 0.1               | 0         | 0.689     | 0.696  | 0.693         | 0.701  | 0.670  | 0.687            | 0.697  |        |
|                         | 0.1 | 0.1               | 0.707     | 0.691     | 0.708  | 0.693         | 0.638  | 0.704  | 0.694            |        |        |
| Interaction Global Test | 15  | Equal             | 0         | 0.1       | 0.757  | 0.525         | 0.765  | 0.492  | 0.742            | 0.771  | 0.550  |
|                         |     |                   | 0.1       | 0.1       | 0.767  | 0.537         | 0.753  | 0.494  | 0.728            | 0.783  | 0.557  |
|                         |     | Group 2 Double    | 0         | 0.1       | 0.706  | 0.502         | 0.694  | 0.444  | 0.726            | 0.719  | 0.515  |
|                         | 0.1 |                   | 0.1       | 0.674     | 0.460  | 0.679         | 0.422  | 0.668  | 0.667            | 0.483  |        |
|                         | 30  |                   | Equal     | 0         | 0.1    | 0.983         | 0.881  | 0.983  | 0.877            | 0.942  | 0.986  |
|                         |     | 0.1               |           | 0.1       | 0.977  | 0.899         | 0.980  | 0.894  | 0.936            | 0.977  | 0.906  |
| Group 2 Double          |     | 0                 | 0.1       | 0.959     | 0.842  | 0.958         | 0.831  | 0.922  | 0.954            | 0.838  |        |
|                         | 0.1 | 0.1               | 0.950     | 0.839     | 0.952  | 0.821         | 0.890  | 0.945  | 0.828            |        |        |
| Interaction Local Test  | 15  | Equal             | 0         | 0.1       | 0.866  | 0.885         | 0.868  | 0.853  | 0.728            | 0.868  | 0.875  |
|                         |     |                   | 0.1       | 0.1       | 0.876  | 0.861         | 0.872  | 0.850  | 0.740            | 0.876  | 0.883  |
|                         |     | Group 2 Double    | 0         | 0.1       | 0.843  | 0.831         | 0.834  | 0.800  | 0.664            | 0.850  | 0.843  |
|                         | 0.1 |                   | 0.1       | 0.808     | 0.793  | 0.811         | 0.761  | 0.612  | 0.818            | 0.805  |        |
|                         | 30  |                   | Equal     | 0         | 0.1    | 0.997         | 0.997  | 0.997  | 0.996            | 0.982  | 0.998  |
|                         |     | 0.1               |           | 0.1       | 0.992  | 0.993         | 0.993  | 0.991  | 0.983            | 0.994  | 0.991  |
| Group 2 Double          |     | 0                 | 0.1       | 0.991     | 0.987  | 0.991         | 0.985  | 0.954  | 0.990            | 0.986  |        |
|                         | 0.1 | 0.1               | 0.989     | 0.984     | 0.988  | 0.982         | 0.947  | 0.989  | 0.986            |        |        |



the four models considered. The only ROI pair level difference that remained significant after  $p$ -value adjustment and correction in any of the models was the difference in the CN and AD group slopes in the FC between the left HC and the right PCC in Models 1 and 2. These models conclude that the FC between the left HC and the right PCC declines at a much quicker rate in the AD population than in their CN counterparts. The estimated group intercepts, group longitudinal trends, group differences in intercepts and longitudinal trends, and  $-\log_{10} p$ -values after correction and adjustment from local hypothesis tests are presented graphically in Figure 3 for Model 1 and Figures S1, S2, and S3 from 7 for Models 2, 3, and 4, respectively.

Table 3: Hypothesis tests on the ADNI data. Global tests and all local tests with unadjusted  $p$ -values of  $< 0.05$  are shown for Model 1.

|                                                                                                                               | $\beta_{CN}$ | $\beta_{AD}$ | Test Statistic | Unadjusted $p$ -value | Adjusted $p$ -value |
|-------------------------------------------------------------------------------------------------------------------------------|--------------|--------------|----------------|-----------------------|---------------------|
| <b>Model 1: One-step, Compound Symmetry <math>\Psi_0</math> and <math>\Psi_1</math>, and Unstructured <math>\Sigma</math></b> |              |              |                |                       |                     |
| <b>Main Effects</b>                                                                                                           |              |              |                |                       |                     |
| HCl and PCCl                                                                                                                  | 0.037        | 0.189        | 42.86          | 0.154                 |                     |
| HCl and PCCr                                                                                                                  | 0.043        | 0.232        | 3.39           | 0.024                 | 0.315               |
| HCr and PCCr                                                                                                                  | 0.011        | 0.168        | 5.26           | 0.004                 | 0.108               |
| PHCl and PQL                                                                                                                  | 0.089        | -0.093       | 3.63           | 0.018                 | 0.315               |
| PHCr and PQL                                                                                                                  | 0.041        | -0.136       | 4.83           | 0.030                 | 0.315               |
|                                                                                                                               |              |              | 4.59           | 0.031                 | 0.315               |
| <b>Interactions</b>                                                                                                           |              |              |                |                       |                     |
| HCl and PCCl                                                                                                                  | 0.004        | -0.011       | 41.85          | 0.197                 |                     |
| HCl and PCCr                                                                                                                  | 0.003        | -0.014       | 5.85           | 0.002                 | 0.090               |
| HCr and PCCr                                                                                                                  | 0.005        | -0.009       | 7.82           | 0.001                 | 0.045               |
| PHCl and PCCr                                                                                                                 | 0.008        | -0.002       | 4.49           | 0.009                 | 0.209               |
|                                                                                                                               |              |              | 2.67           | 0.032                 | 0.315               |

## 4 Discussion

### 4.1 Simulated Data

The Type I error results from Table 1 show roughly nominal Type I error rates for all three models fit to the simulated data. While there was some slight inflation in all three models, especially for the 10 ROI simulations, the inflation was somewhat attenuated by the increase in sample size from 15 to 30 per group. Table 2 demonstrates adequate power, both locally and globally for all three models. As expected, power increased with larger group size and decreased with a larger true group 2 variance.

There was no consistent difference in performance between the three models in terms of power or Type I error across the different simulation settings. The two full variance settings match the true model of the simulated data, yet the reduced variance model did not suffer in comparison. While the reduced variance model was not the true model, it may have offered similar performance because the smaller parameter space allowed for improved estimation. The reduced variance model did not capture the full true variance, but it still performed well by allowing the FC for each ROI pair to be correlated across multiple visits for a given subject.

Overall, the full convergence results did not consistently improve on the one-step estimator results. With little to nothing to gain in terms of power and Type I error, the additional computational resources used by the full-convergence model did not offer any practical advantage. One of the main differences in the performance of the three models was the computational time. Table 4 shows the relative timing of the three models fit to each simulation scenario. The full convergence model took, on average, over 2.5 times longer to run without seeing any notable boost in performance. For reference, using a 3.7 GHz Quad-Core Intel Xeon with 16GB ram, the average times for fitting the one-step full variance model with 30 subjects per group for 3, 5, and 10 ROIs were 3.8 seconds, 54.9 seconds, and 87.2 minutes, respectively. These results show that the time increases quickly with the dimension of the model. The computational time is largely driven by the permutation procedure. Thus, if a larger number of permutations is desired for the testing procedure, then the computational time will also increase.

Table 4: Average relative timing of the three models considered in the simulation study.

| Convergence Type | Variance Structure | Relative Time |
|------------------|--------------------|---------------|
| Full             | Full               | 2.56          |
| One-Step         | Full               | 1.02          |
| One-Step         | Reduced            | 1.00          |

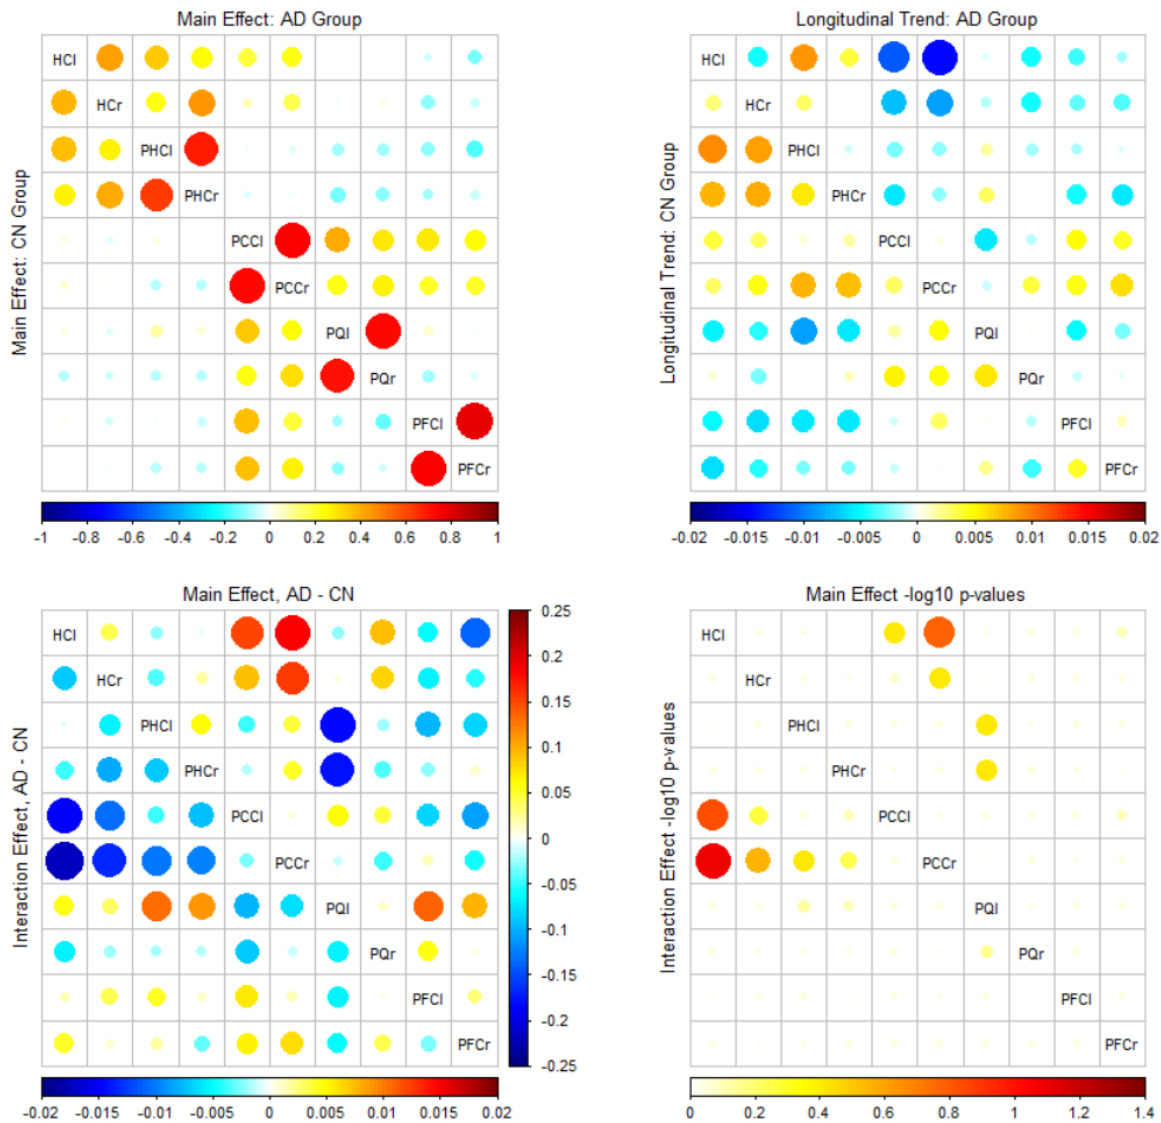

Figure 3: Model 1 results. Top left: A plot of the estimated intercept terms for the CN group (bottom left triangle) and AD group (top right triangle). Top right: A plot of the estimated slope terms for the CN group (bottom left triangle) and AD group (top right triangle). Bottom left: a plot of the group differences (AD estimates - CN estimates) for the estimated intercepts (top right triangle) and slopes (bottom left triangle). Bottom right: A plot of the  $-\log_{10}$  corrected and adjusted  $p$ -values from all local hypothesis tests of group differences (AD estimates - CN estimates) for the estimated intercepts (top right triangle) and slopes (bottom left triangle).

## 4.2 ADNI Data

The four models fit to the ADNI data present slightly different results. The difference between Model 1 and Model 2 is very minimal. The nearly identical results provide further support of the conclusion from the simulation study that the full convergence and one-step estimator models lead to very similar estimates and inference. Some more pronounced differences in results arise when Model 1 is compared with Models 3 and 4. These differences make sense considering that Model 4 does not account for the within-subject dependence of the FC and thus appears to suffer from diminished power to detect group differences.

The more interesting differences exist in comparing Models 1 and 3, but some common patterns run throughout both sets of results. In both models, many of the local hypotheses that were significant prior to the FDR correction appear between the HC/PHC and the PCC. These groups differences strengthen the one local hypothesis that is significant after FDR correction from Models 1 and 2 which shows a significantly larger decrease in FC between the HCl and PCCr in the AD group than in the CN group. While the significant results disappears after FDR correction, the fact that many other HC/PHC connections with the PCC see a similar pattern helps to indicate differing baseline and longitudinal trend effects in the FC of the two groups. This clustering of group differences can be seen in Figure 3 with the smallest  $p$ -values (red and orange circles) appearing between the HC/PHC and PCC. Furthermore, this apparent difference in FC between the HC and PCC supports previous reports in the literature. Wang et al. [2006], Sorg et al. [2007], and Greicius et al. [2004] all noted decreased FC between the HC and PCC in patients with AD in analyses of cross-sectional data. Similar results from Supekar et al. [2008] showed decreased clustering coefficients for the HC. Our analysis confirms these results with the addition of a longitudinal component to the analysis. Our results not only conclude that AD and CN patients have differing FC between the HC and PCC, as the previous works have shown, but we also more clearly describe the differences in baseline and longitudinal trend in FC between these two regions.

## 4.3 Current Limitations and Future Work

Our familiar linear model framework utilized in this paper allows for easy adoption and understanding of the model and its results. Additionally, the linear model framework offers many natural extensions, including terms for additional covariates such as scanner effect or gender and different structures for the variance components to capture a wider range of possible correlation structures.

Our current method has the advantage of allowing for joint modeling of a complete FC network rather than taking a massive univariate approach. We see this joint modeling as a significant step forward, but complete brain analyses are still not yet feasible due to high computational demands of a model fit to many ROIs and the limited sample size of many fMRI studies. Here we have fit models to 10 ROI networks, but many brain atlases include at least 100 regions. In the future, some form of regularization could be introduced into the model to allow for analysis of an entire brain atlas.

The selection of the proper structure for the variance components deserves more attention. While a block compound symmetry structure for  $\Psi$  has a natural interpretation similar to that of a random intercept, it is certainly possible to conceive of other viable structures. Choosing between structures is not a trivial task. One way to alleviate the model selection dilemma is to introduce a more robust sandwich type estimator of  $\widehat{\text{Var}}(\hat{\beta})$ , in which case incorrect specification of the variance would only lead to reduced power.

## 5 Conclusions

We have introduced a novel variance components longitudinal model to estimate and draw inference on the group differences in FC using resting-state fMRI data. The model properly accounts for the correlation inherent in repeated measures data and the autocorrelation present in fMRI time series. A permutation testing procedure performs global and local two-sample testing in an efficient manner. The linear model framework and utilization of generalized least squares estimators offers great simplicity and a large number of natural extensions. This work fills a current gap in the literature by providing a general framework for estimation and hypothesis testing of longitudinal FC data.

As a practical example, we applied the method to resting-state fMRI data from the ADNI database. Our analysis found a faster decline in FC between the left hippocampus and the right posterior cingulate cortex in AD patients compared to the CN control group. This finding confirms the results of previous studies and helps solidify the central roles of the hippocampus and default mode network in AD.

## 6 Acknowledgments

Data collection and sharing for this project was funded by the ADNI (National Institutes of Health Grant U01 AG024904) and DOD ADNI (Department of Defense award number W81XWH-12-2-0012). For further acknowledgments see 7.

## 7 Supplement

**Supplement A: Supplemental Tables and Figures** Table S1 of this supplement shows additional simulation study Type I error results. Table S2 shows significant results from Models 2, 3, and 4 in table form. Figures S1, S2, and S3 present the modeling results graphically. Additional acknowledgments are given at the end of the supplement.

## References

- Takeshi Amemiya. A note on a heteroscedastic model. *Journal of Econometrics*, 6(3):365–370, 1977.
- Yoav Benjamini and Yosef Hochberg. Controlling the false discovery rate: a practical and powerful approach to multiple testing. *Journal of the Royal Statistical Society. Series B (Methodological)*, 57(1):289–300, 1995.
- Alex Chase. Altered functional connectivity in preclinical dementia. *Nature Reviews Neurology*, 10(11):609, 2014.
- Pin-Yu Chen, Jeng-Min Chiou, Ya-Fang Yang, Yu-Ting Chen, Hsin-Long Hsieh, Yu-Ling Chang, and Wen-Yih I Tseng. Heterogeneous aging effects on functional connectivity in different cortical regions: A resting-state functional mri study using functional data analysis. *PLOS ONE*, 11(9):e0162028, 2016.
- EunYi Chung and Joseph P Romano. Exact and asymptotically robust permutation tests. *The Annals of Statistics*, 41(2):484–507, 2013.
- Mark Fiecas, Ivor Cribben, Reyhaneh Bahktiari, and Jacqueline Cummine. A variance components model for statistical inference on functional connectivity networks. *NeuroImage*, 149:256–266, 2017.
- Emily S Finn and R Todd Constable. Individual variation in functional brain connectivity: implications for personalized approaches to psychiatric disease. *Dialogues in Clinical Neuroscience*, 18(3):277–287, 2016.
- KJ Friston, CD Frith, PF Liddle, and RSJ Frackowiak. Functional connectivity: the principal-component analysis of large (pet) data sets. *Journal of Cerebral Blood Flow & Metabolism*, 13(1):5–14, 1993.
- Habib Ganjgahi, Anderson M Winkler, David C Glahn, John Blangero, Peter Kochunov, and Thomas E Nichols. Fast and powerful heritability inference for family-based neuroimaging studies. *NeuroImage*, 115:256–268, 2015.
- Michael D Greicius, Gaurav Srivastava, Allan L Reiss, and Vinod Menon. Default-mode network activity distinguishes alzheimer’s disease from healthy aging: evidence from functional mri. *Proceedings of the National Academy of Sciences of the United States of America*, 101(13):4637–4642, 2004.
- Anne Hafkemeijer, Jeroen van der Grond, and Serge ARB Rombouts. Imaging the default mode network in aging and dementia. *Biochimica et Biophysica Acta (BBA)-Molecular Basis of Disease*, 1822(3):431–441, 2012.
- Dominic Holland, Rahul S Desikan, Anders M Dale, Linda K McEvoy, Alzheimers Disease Neuroimaging Initiative, et al. Rates of decline in alzheimer disease decrease with age. *PLOS ONE*, 7(8):e42325, 2012.
- Nan Laird. Analysis of longitudinal and cluster-correlated data. In *NSF-CBMS Regional Conference Series in Probability and Statistics*, pages i–155. JSTOR, 2004.
- Yuxia Li, Xiaoni Wang, Yongqiu Li, Yu Sun, Can Sheng, Hongyan Li, Xuanyu Li, Yang Yu, Guanqun Chen, Xiaochen Hu, et al. Abnormal resting-state functional connectivity strength in mild cognitive impairment and its conversion to alzheimers disease. *Neural Plasticity*, 2016, 2015.
- Guy Melard, Marianne Paesmans, and Roch Roy. Consistent estimation of the asymptotic covariance structure of multivariate serial correlations. *Journal of Time Series Analysis*, 12(4):351–361, 1991.
- Belinda Phipson, Gordon K Smyth, et al. Permutation p-values should never be zero: calculating exact p-values when permutations are randomly drawn. *Stat Appl Genet Mol Biol*, 9(1):Article39–Article39, 2010.

- Ping Ren, Raymond Y Lo, Benjamin P Chapman, Mark Mapstone, Anton Porsteinsson, and Feng Lin. Longitudinal alteration of intrinsic brain activity in the striatum in mild cognitive impairment. *Journal of Alzheimer's Disease*, 54(1):69–78, 2016.
- Roch Roy. Asymptotic covariance structure of serial correlations in multivariate time series. *Biometrika*, 76(4):824–827, 1989.
- Christian Sorg, Valentin Riedl, Mark Mühlau, Vince D Calhoun, Tom Eichele, Leonhard Läer, Alexander Drzezga, Hans Förstl, Alexander Kurz, Claus Zimmer, et al. Selective changes of resting-state networks in individuals at risk for alzheimer's disease. *Proceedings of the National Academy of Sciences*, 104(47):18760–18765, 2007.
- Kaustubh Supekar, Vinod Menon, Daniel Rubin, Mark Musen, and Michael D Greicius. Network analysis of intrinsic functional brain connectivity in alzheimer's disease. *PLoS Comput Biol*, 4(6):e1000100, 2008.
- Cajo JF Ter Braak. Permutation versus bootstrap significance tests in multiple regression and anova. In *Bootstrapping and related techniques*, pages 79–85. Springer, 1992.
- Wiesje M van der Flier, Yolande AL Pijnenburg, Nick C Fox, and Philip Scheltens. Early-onset versus late-onset alzheimer's disease: the case of the missing apoe 4 allele. *The Lancet Neurology*, 10(3):280–288, 2011.
- Kun Wang, Meng Liang, Liang Wang, Lixia Tian, Xinqing Zhang, Kuncheng Li, and Tianzi Jiang. Altered functional connectivity in early alzheimer's disease: a resting-state fmri study. *Human Brain Mapping*, 28(10):967–978, 2007.
- Liang Wang, Yufeng Zang, Yong He, Meng Liang, Xinqing Zhang, Lixia Tian, Tao Wu, Tianzi Jiang, and Kuncheng Li. Changes in hippocampal connectivity in the early stages of alzheimer's disease: evidence from resting state fmri. *NeuroImage*, 31(2):496–504, 2006.
- Liang Wang, Catherine M Roe, Abraham Z Snyder, Matthew R Brier, Jewell B Thomas, Chengjie Xiong, Tammie L Benzinger, John C Morris, and Beau M Ances. Alzheimer disease family history impacts resting state functional connectivity. *Annals of Neurology*, 72(4):571–577, 2012.
- Anderson M Winkler, Gerard R Ridgway, Matthew A Webster, Stephen M Smith, and Thomas E Nichols. Permutation inference for the general linear model. *NeuroImage*, 92:381–397, 2014.
- Jie Xiang, Hao Guo, Rui Cao, Hong Liang, Junjie Chen, et al. An abnormal resting-state functional brain network indicates progression towards alzheimer's disease. *Neural Regeneration Research*, 8(30):2789, 2013.

TABLE S1

*Type I error rates for simulation study. Type I errors for the main effect (group difference in intercepts) and interaction effect (group difference in slopes) are reported both globally and locally. The global Type I errors are averaged across all models. The local Type I errors reported are unadjusted and averaged across all simulations and all null ROI pairs.*

|                                           |               | Convergence Type:<br>Variance Structure: |           |           | Full<br>Full |           | One-Step<br>Full |           |            | One-Step<br>Reduced |           |
|-------------------------------------------|---------------|------------------------------------------|-----------|-----------|--------------|-----------|------------------|-----------|------------|---------------------|-----------|
|                                           | Group<br>Size | Variance                                 | $\beta_0$ | $\beta_1$ | 3<br>ROIs    | 5<br>ROIs | 3<br>ROIs        | 5<br>ROIs | 10<br>ROIs | 3<br>ROIs           | 5<br>ROIs |
| <b>Main<br/>Effect<br/>Local<br/>Test</b> | 15            | Equal                                    | 0.1       | 0.1       | 0.050        | 0.062     | 0.050            | 0.067     | 0.069      | 0.054               | 0.066     |
|                                           |               |                                          | 0.1       | 0         | 0.054        | 0.060     | 0.050            | 0.057     | 0.067      | 0.056               | 0.061     |
|                                           |               | Group 2                                  | 0.1       | 0.1       | 0.061        | 0.064     | 0.056            | 0.062     | 0.067      | 0.057               | 0.062     |
|                                           | 30            | Double                                   | 0.1       | 0         | 0.066        | 0.065     | 0.068            | 0.061     | 0.064      | 0.066               | 0.063     |
|                                           |               |                                          | 0.1       | 0.1       | 0.052        | 0.057     | 0.053            | 0.057     | 0.054      | 0.053               | 0.059     |
|                                           |               | Group 2                                  | 0.1       | 0         | 0.048        | 0.058     | 0.046            | 0.057     | 0.054      | 0.048               | 0.057     |
| <b>Interaction<br/>Local<br/>Test</b>     | 15            | Equal                                    | 0.1       | 0.1       | 0.060        | 0.062     | 0.060            | 0.068     | 0.073      | 0.060               | 0.063     |
|                                           |               |                                          | 0         | 0.1       | 0.072        | 0.062     | 0.074            | 0.068     | 0.073      | 0.072               | 0.060     |
|                                           |               | Group 2                                  | 0.1       | 0.1       | 0.058        | 0.067     | 0.055            | 0.065     | 0.069      | 0.061               | 0.065     |
|                                           | 30            | Double                                   | 0         | 0.1       | 0.068        | 0.060     | 0.070            | 0.061     | 0.073      | 0.066               | 0.062     |
|                                           |               |                                          | 0.1       | 0.1       | 0.056        | 0.054     | 0.054            | 0.056     | 0.054      | 0.056               | 0.057     |
|                                           |               | Group 2                                  | 0         | 0.1       | 0.058        | 0.058     | 0.054            | 0.057     | 0.057      | 0.054               | 0.058     |
| 30                                        | Double        | 0.1                                      | 0.1       | 0.062     | 0.053        | 0.064     | 0.055            | 0.056     | 0.063      | 0.053               |           |
|                                           |               | 0                                        | 0.1       | 0.064     | 0.054        | 0.062     | 0.053            | 0.060     | 0.062      | 0.053               |           |



TABLE S2  
*Hypothesis tests on the ADNI data. Global tests and all local tests with unadjusted p-values of < 0.05 are shown for Models 2-4.*

|                                                                                                                                       | $\beta_{CN}$ | $\beta_{AD}$ | Test Statistic | Unadjusted p-value | Adjusted p-value |
|---------------------------------------------------------------------------------------------------------------------------------------|--------------|--------------|----------------|--------------------|------------------|
| <b>Model 2: Full Convergence, Compound Symmetry <math>\Psi_0</math> and <math>\Psi_1</math>, and Unstructured <math>\Sigma</math></b> |              |              |                |                    |                  |
| <b>Main Effects</b>                                                                                                                   |              |              | 42.06          | 0.156              |                  |
| HCl and PCCl                                                                                                                          | 0.037        | 0.189        | 3.35           | 0.024              | 0.317            |
| HCl and PCCr                                                                                                                          | 0.043        | 0.232        | 5.14           | 0.004              | 0.111            |
| HCr and PCCr                                                                                                                          | 0.010        | 0.168        | 3.57           | 0.019              | 0.317            |
| PHCl and PQl                                                                                                                          | 0.089        | -0.093       | 4.79           | 0.030              | 0.317            |
| PHCr and PQl                                                                                                                          | 0.042        | -0.136       | 4.56           | 0.029              | 0.317            |
| <b>Interactions</b>                                                                                                                   |              |              | 41.26          | 0.199              |                  |
| HCl and PCCl                                                                                                                          | 0.004        | -0.011       | 5.77           | 0.002              | 0.081            |
| HCl and PCCr                                                                                                                          | 0.003        | -0.014       | 7.65           | 0.001              | 0.027            |
| HCr and PCCr                                                                                                                          | 0.005        | -0.009       | 4.41           | 0.010              | 0.218            |
| PHCl and PCCr                                                                                                                         | 0.008        | -0.002       | 2.61           | 0.032              | 0.317            |
| <b>Model 3: One-step, Scaled Identity <math>\Psi_0</math> and <math>\Psi_1</math>, and Diagonal <math>\Sigma</math></b>               |              |              |                |                    |                  |
| <b>Main Effects</b>                                                                                                                   |              |              | 47.75          | 0.312              |                  |
| HCl and PCCl                                                                                                                          | 0.058        | 0.228        | 3.95           | 0.021              | 0.367            |
| HCl and PCCr                                                                                                                          | 0.068        | 0.269        | 5.51           | 0.005              | 0.150            |
| PHCl and PQl                                                                                                                          | 0.125        | -0.074       | 5.37           | 0.033              | 0.367            |
| PHCr and PQl                                                                                                                          | 0.056        | -0.164       | 6.57           | 0.009              | 0.207            |
| PCCl and PFCr                                                                                                                         | 0.381        | 0.240        | 2.86           | 0.033              | 0.367            |
| <b>Interactions</b>                                                                                                                   |              |              | 54.90          | 0.238              |                  |
| HCl and PCCl                                                                                                                          | 0.002        | -0.013       | 5.14           | 0.005              | 0.150            |
| HCl and PCCr                                                                                                                          | 0.000        | -0.017       | 6.49           | 0.017              | 0.150            |
| PHCl and PCCr                                                                                                                         | 0.007        | -0.003       | 2.75           | 0.037              | 0.367            |
| PHCl and PQl                                                                                                                          | -0.011       | 0.003        | 4.71           | 0.049              | 0.403            |
| PHCr and PQl                                                                                                                          | -0.007       | 0.006        | 3.66           | 0.047              | 0.403            |
| PQl and PQr                                                                                                                           | 0.007        | 0.000        | 1.31           | 0.035              | 0.367            |
| <b>Model 4: One-step, Scaled Identity <math>\Psi_0</math>, Zero <math>\Psi_1</math>, and Diagonal <math>\Sigma</math></b>             |              |              |                |                    |                  |
| <b>Main Effects</b>                                                                                                                   |              |              | 62.65          | 0.412              |                  |
| HCl and PCCr                                                                                                                          | 0.078        | 0.281        | 8.41           | 0.013              | 0.513            |
| PHCr and PQl                                                                                                                          | 0.040        | -0.162       | 6.61           | 0.023              | 0.513            |
| PCCl and PFCr                                                                                                                         | 0.402        | 0.223        | 4.35           | 0.018              | 0.513            |
| <b>Interactions</b>                                                                                                                   |              |              | 68.63          | 0.317              |                  |
| HCl and PCCl                                                                                                                          | 0.000        | -0.013       | 5.60           | 0.036              | 0.592            |
| HCl and PCCr                                                                                                                          | -0.001       | -0.018       | 9.11           | 0.006              | 0.513            |
| PHCl and PCCr                                                                                                                         | 0.006        | -0.004       | 3.83           | 0.040              | 0.592            |

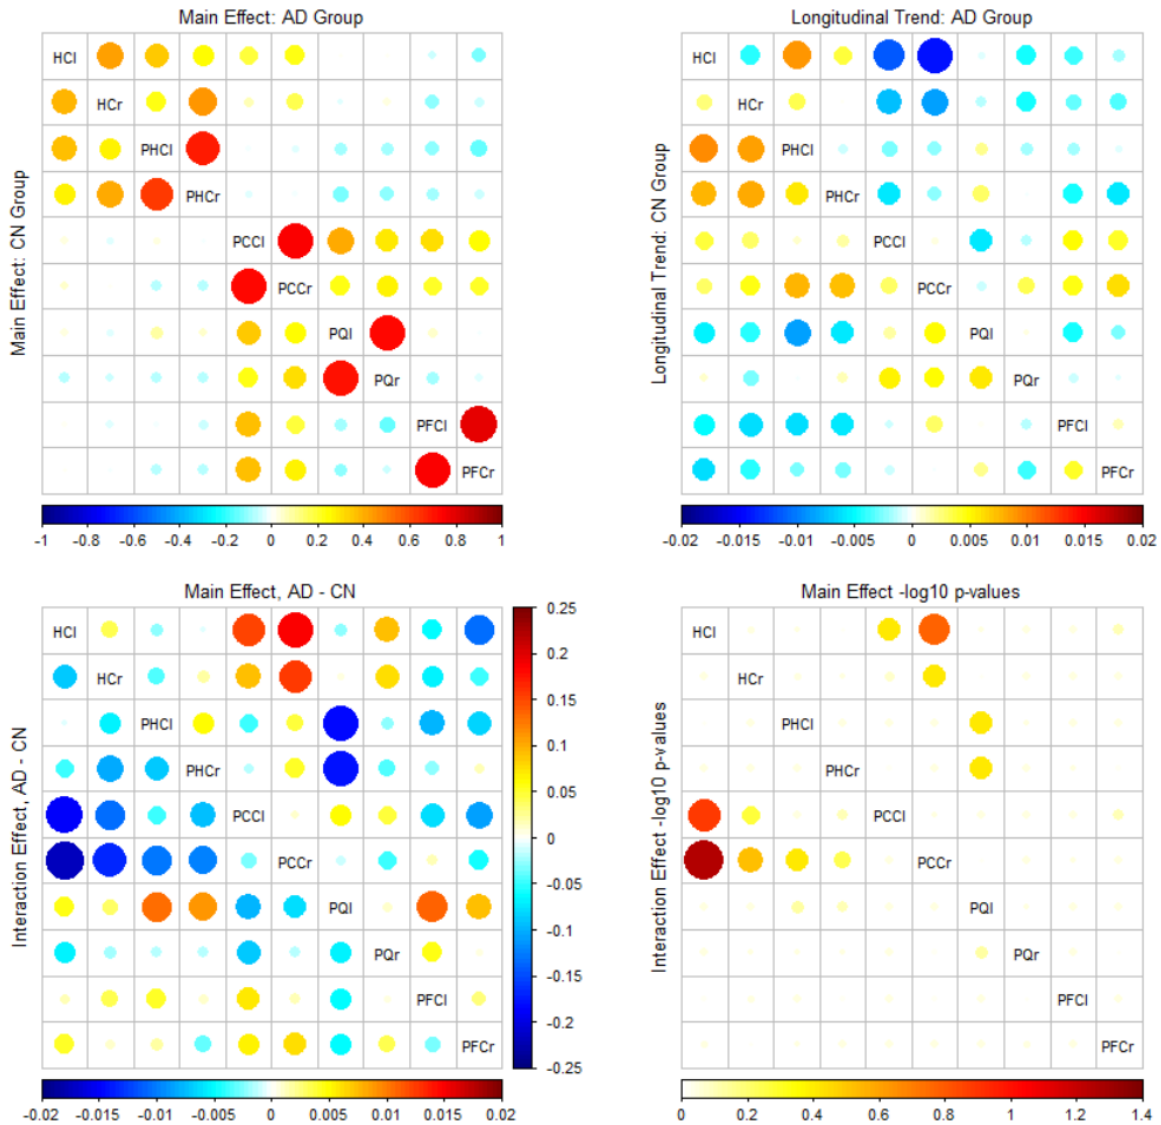

FIG S1. Model 2 results. Top left: A plot of the estimated intercept terms for the CN group (bottom left triangle) and AD group (top right triangle). Top right: A plot of the estimated slope terms for the CN group (bottom left triangle) and AD group (top right triangle). Bottom left: a plot of the group differences (AD estimates - CN estimates) for the estimated intercepts (top right triangle) and slopes (bottom left triangle). Bottom right: A plot of the  $-\log_{10}$  corrected and adjusted p-values from all local hypothesis tests of group differences (AD estimates - CN estimates) for the estimated intercepts (top right triangle) and slopes (bottom left triangle).

4

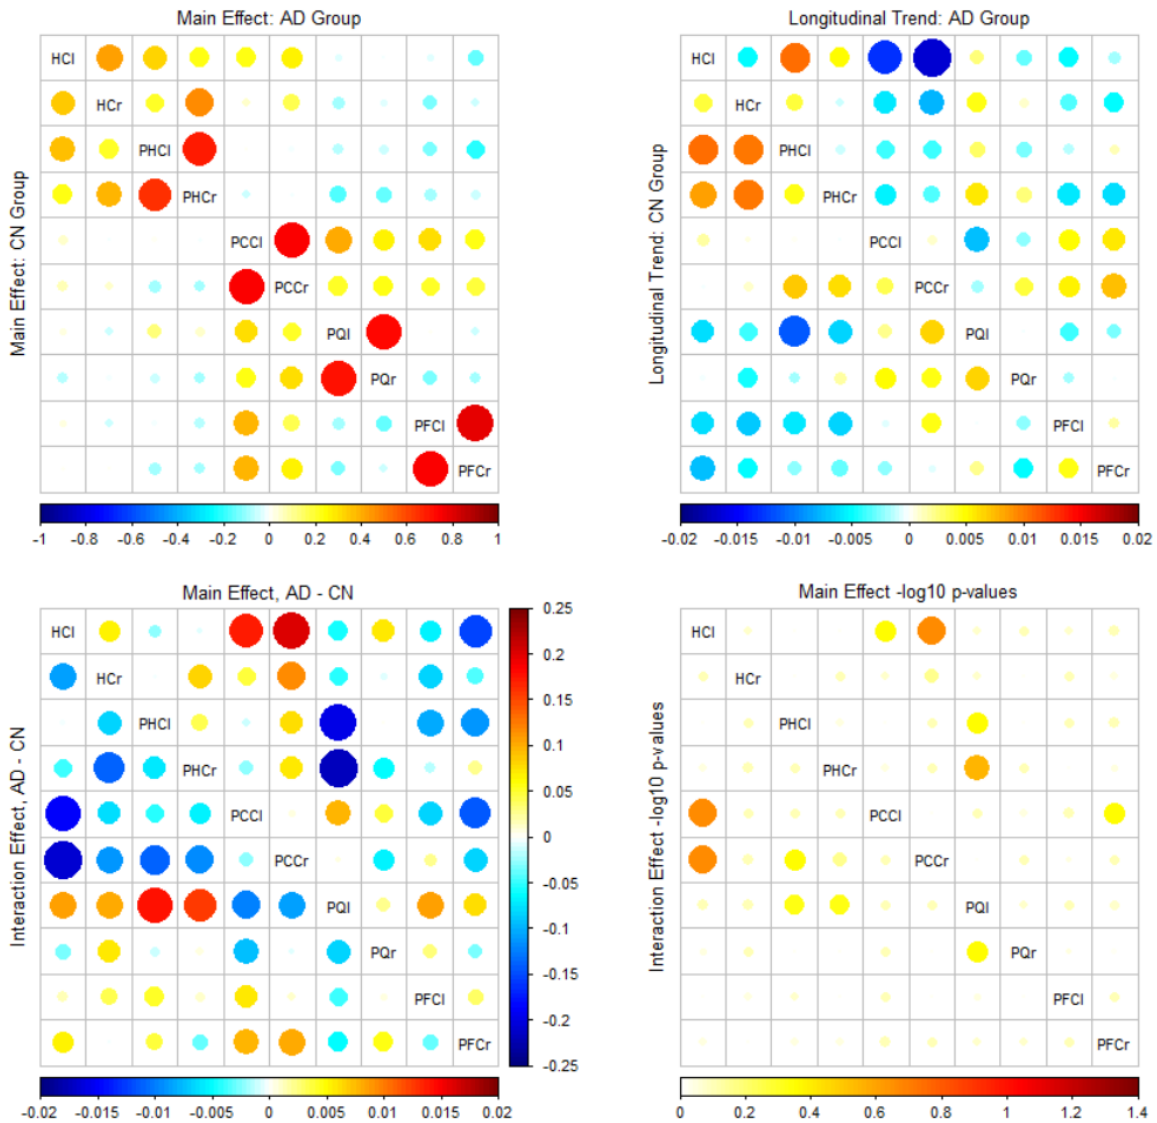

FIG S2. Model 3 results. Top left: A plot of the estimated intercept terms for the CN group (bottom left triangle) and AD group (top right triangle). Top right: A plot of the estimated slope terms for the CN group (bottom left triangle) and AD group (top right triangle). Bottom left: a plot of the group differences (AD estimates - CN estimates) for the estimated intercepts (top right triangle) and slopes (bottom left triangle). Bottom right: A plot of the  $-\log_{10}$  corrected and adjusted p-values from all local hypothesis tests of group differences (AD estimates - CN estimates) for the estimated intercepts (top right triangle) and slopes (bottom left triangle).

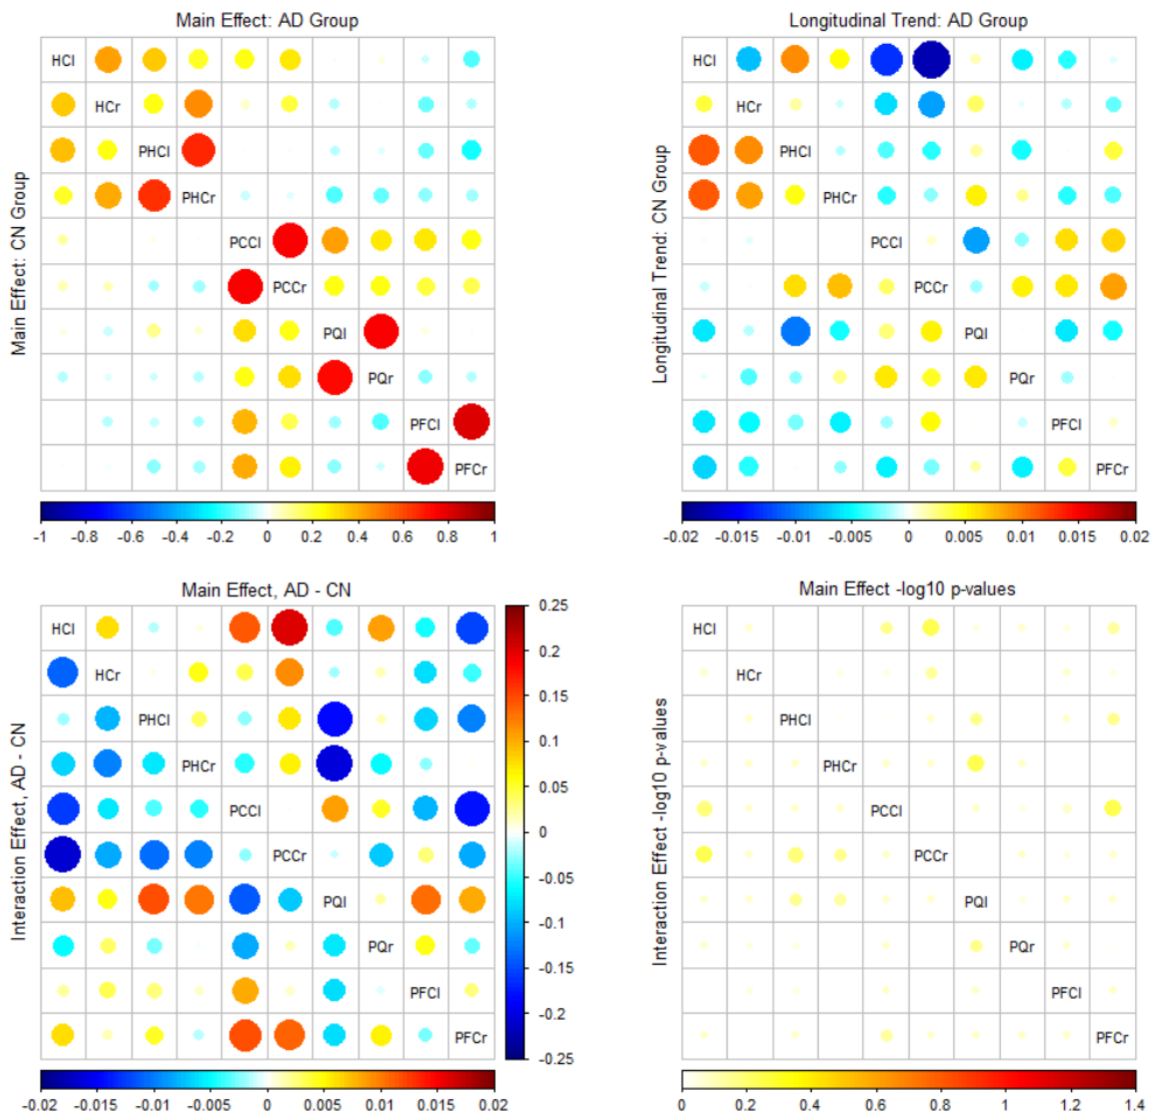

FIG S3. Model 4 results. Top left: A plot of the estimated intercept terms for the CN group (bottom left triangle) and AD group (top right triangle). Top right: A plot of the estimated slope terms for the CN group (bottom left triangle) and AD group (top right triangle). Bottom left: a plot of the group differences (AD estimates - CN estimates) for the estimated intercepts (top right triangle) and slopes (bottom left triangle). Bottom right: A plot of the  $-\log_{10}$  corrected and adjusted p-values from all local hypothesis tests of group differences (AD estimates - CN estimates) for the estimated intercepts (top right triangle) and slopes (bottom left triangle).

**1. Acknowledgments.** ADNI is funded by the National Institute on Aging, the National Institute of Biomedical Imaging and Bioengineering, and through generous contributions from the following: AbbVie, Alzheimers Association; Alzheimers Drug Discovery Foundation; Araclon Biotech; BioClinica, Inc.; Biogen; Bristol-Myers Squibb Company; CereSpir, Inc.; Cogstate; Eisai Inc.; Elan Pharmaceuticals, Inc.; Eli Lilly and Company; EuroImmun; F. Hoffmann-La Roche Ltd and its affiliated company Genentech, Inc.; Fujirebio; GE Healthcare; IXICO Ltd.; Janssen Alzheimer Immunotherapy Research & Development, LLC.; Johnson & Johnson Pharmaceutical Research & Development LLC.; Lumosity; Lundbeck; Merck & Co., Inc.; Meso Scale Diagnostics, LLC.; NeuroRx Research; Neurotrack Technologies; Novartis Pharmaceuticals Corporation; Pfizer Inc.; Piramal Imaging; Servier; Takeda Pharmaceutical Company; and Transition Therapeutics. The Canadian Institutes of Health Research is providing funds to support ADNI clinical sites in Canada. Private sector contributions are facilitated by the Foundation for the National Institutes of Health ([www.fnih.org](http://www.fnih.org)). The grantee organization is the Northern California Institute for Research and Education, and the study is coordinated by the Alzheimers Therapeutic Research Institute at the University of Southern California. ADNI data are disseminated by the Laboratory for Neuro Imaging at the University of Southern California.
